# Supplementary material for: Three new pentatricopeptide repeat proteins facilitate the splicing of mitochondrial transcripts and complex I biogenesis in Arabidopsis
Source: PubMed Central journal article supplement (PMC6184586; doi:10.1093/jxb/ery275), 2018-07-25
Supplement: ery275_suppl_supplementary_figures_and_table.pdf [file ery275_suppl_supplementary_figures_and_table.pdf]

| Name           | Sequence 5'-3'                        | Experiment                          |
|----------------|---------------------------------------|-------------------------------------|
| GWPPR-P26-7    | CAAAAAAGCAGGCTAAAATGGCGTCAGCTTTGCGCCG | GFP expression                      |
| GWPPR-P26-8    | CAAGAAAGCTGGGTCAGAAGATGAGATCTCATAAG   |                                     |
| GWPPR-P68-5    | CAAAAAAGCAGGCTAAAATGATGTATGTATCTGCTCG |                                     |
| GWPPR-P68-6    | CAAGAAAGCTGGGTCACGCTAACATATGTGTTAC    |                                     |
| GWPPR-P74-3    | CAAAAAAGCAGGCTAAAATGATTCGCCGGCCGATCTA |                                     |
| GWPPR-P74-6    | CAAGAAAGCTGGGTCAGAATGGCGGAAATTGGGCTG  |                                     |
| PPR-P26-3      | CGAACGAGATTACGATTCGG                  | Genotyping                          |
| PPR-P26-1      | TTTGGTGGGAATGGAAGTTGAC                |                                     |
| PPR-P26-2      | TGTTTAGGGTTTTGGAAGAGATG               |                                     |
| PPR-P68-1      | TGCAATTTTGAATAGTTCCGG                 |                                     |
| PPR-P68-2      | CCGAGTTGTAAGTGCTCGAAG                 |                                     |
| PPR-P68-3      | TTCAGTTTTTCAAATGGGCTG                 |                                     |
| PPR-P68-4      | GCTCATTGCTGCTTCATATC                  |                                     |
| PPR-P74-1      | GCATGCCAGAATACGGTTATG                 |                                     |
| PPR-P74-2      | ATCCACATCAGGGACAACATC                 |                                     |
| PPR-P74-4      | TAACTGAGATACCGACCACC                  |                                     |
| PPR-P74-7      | AGCTTTTCAGGATCAGGAGGA                 |                                     |
| LB-Gabi1       | CCCATTGGACGTGAATGTAGACAC              |                                     |
| LB-Salk2       | GCTTTCTCCCTTCCTTTCTC                  |                                     |
| LB3-Sail       | TAGCATCTGAATTTCATAACCAATCTCGATACAC    |                                     |
| RT-P26-1       | TGGAGGATTTACGAATGTGCGA                | RT-PCR                              |
| RT-P26-2       | TTCATCGGGCACAACCCTT                   |                                     |
| RT-PR68-1      | TCAGTGC GGATGTTGGATGA                 |                                     |
| RT-PR68-2      | CACTCGACCCACTTTGCCTA                  |                                     |
| RT-P74-1       | CGCAATCGGATCCTCTCCTC                  |                                     |
| RT-P74-2       | ACCTATCAGGCACGAATCCTT                 |                                     |
| nad1e7         | CATCACCTAGCAAGCCTAAC                  | northern blot, nad1 probe           |
| nad1e8         | TAAGGAAGCCATTGAAAGGTG                 |                                     |
| nad1 int4-1    | ACGGGAAAGTTGACTCCTGG                  | northern blot, nad1 intron 4 probe  |
| nad1 int4-2    | AGGGCTTCCCTCAGTTCAGT                  |                                     |
| nad2e1         | GCAGAATTCGTTCCGGATC                   | northern blot, nad2 probe           |
| nad2e8         | TATGAACTGAGTGCCATTTGA                 |                                     |
| nad2 int2a-1   | ATGACGAAAGGAGAGTCGGC                  | northern blot, nad2 intron 2a probe |
| nad2 int2a-2   | TTCTGGCCCTGTGAACATC                   |                                     |
| nad2 int2b-1   | CCAACGGGGAATAGAAGCGA                  | northern blot, nad2 intron 2b probe |
| nad2 int2b-2   | ATACGGCTCGCACAAGACT                   |                                     |
| nad2 int3-1    | TTAGTCAATGGGGCAGCAGG                  | northern blot, nad2 intron 3 probe  |
| nad2 int3-2    | TCACACGAAAGGGAACGAGG                  |                                     |
| nad2 int4-1    | GGGAATGCATGCTACGAAAGA                 | northern blot, nad2 intron 4 probe  |
| nad2 int4-2    | TTCCGCCCCCAATGAGATG                   |                                     |
| nad4F          | ATTCTATGTTTTCCCGAAAGC                 | northern blot, nad4 probe           |
| nad4R          | TGAAATTTGCCATGTTGCAC                  |                                     |
| nad4 int1-1    | CCCGCCCAATCCAATAAGA                   | northern blot, nad4 intron 1 probe  |
| nad4 int1-2    | AGACCTGGACGATTATCCCT                  |                                     |
| nad5F          | AACATTGCAAAGGCATAATGA                 | northern blot, nad5 probe           |
| nad5R          | CCATGGATCTCATCGGAAAT                  |                                     |
| nad5 intron4-1 | TCCCTATGGACAAGGGGACA                  | northern blot, nad5 intron 4 probe  |
| nad5 intron4-2 | ACTCTTCATTCTCCCGTGCT                  |                                     |

**Supplementary Table S1: Oligonucleotides used in this study.**

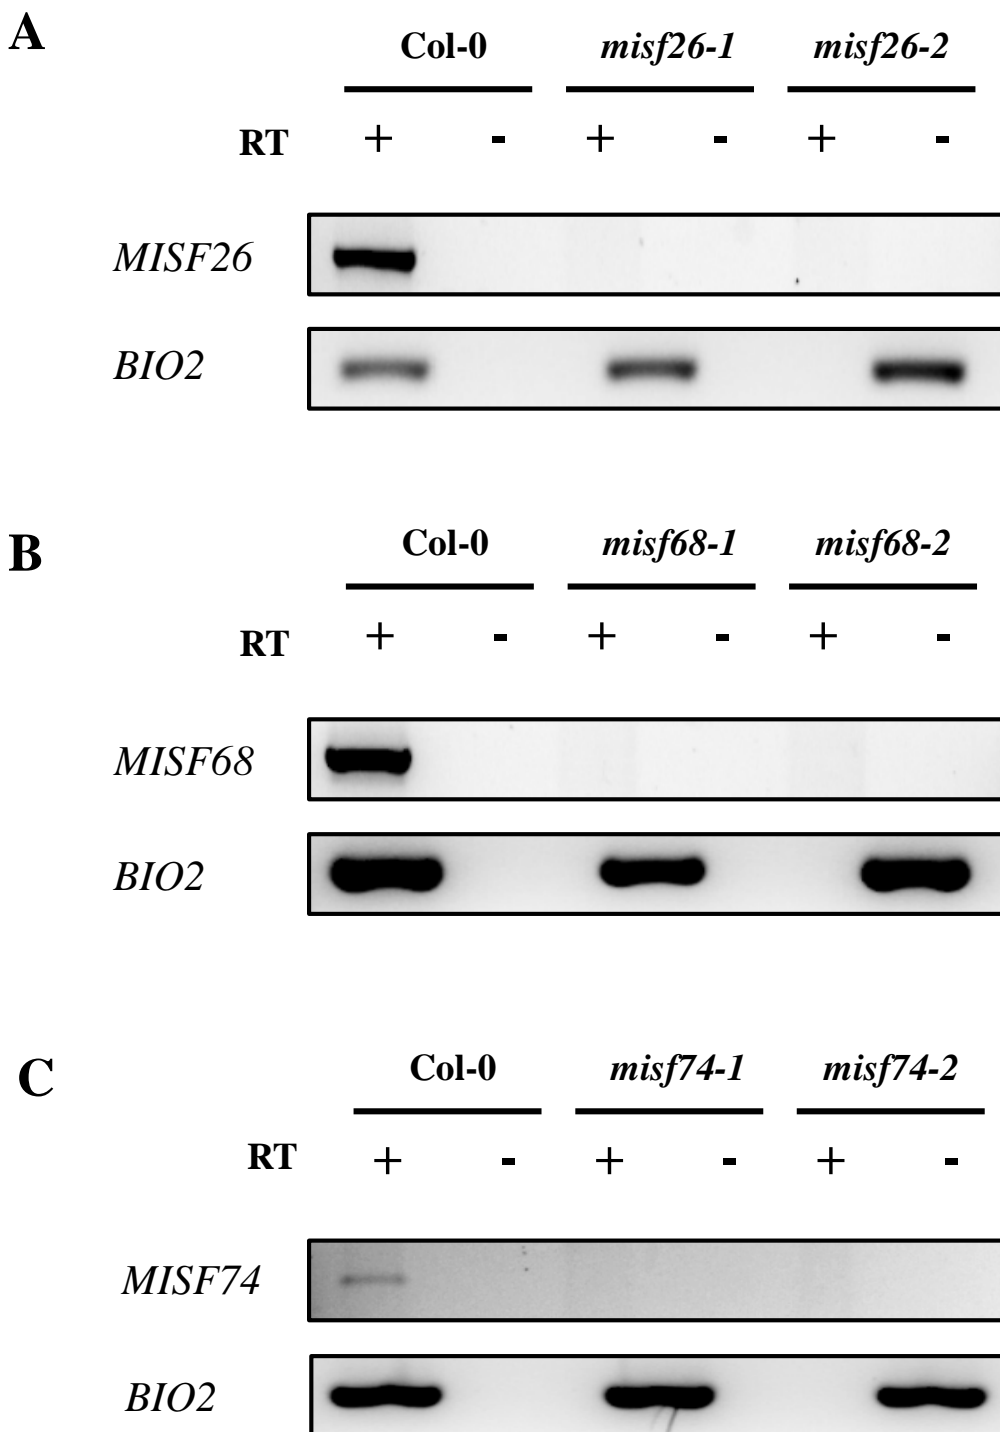

**Supplementary Figure S1: RT-PCR analysis of each *MISF* transcript in wild-type and *misf* mutants.** cDNA prepared from both wild-type and *misf* plants were PCR amplified using primers located on both sides of the T-DNA insertion sites corresponding to each *misf* mutation, and the resulting amplification products were size fractionated on agarose gel. The amplification of *BIO2* cDNA was done separately to control the efficiency of the RT reaction. Reverse transcriptase was either added (RT+) or omitted (RT-) from the initial RT reaction.

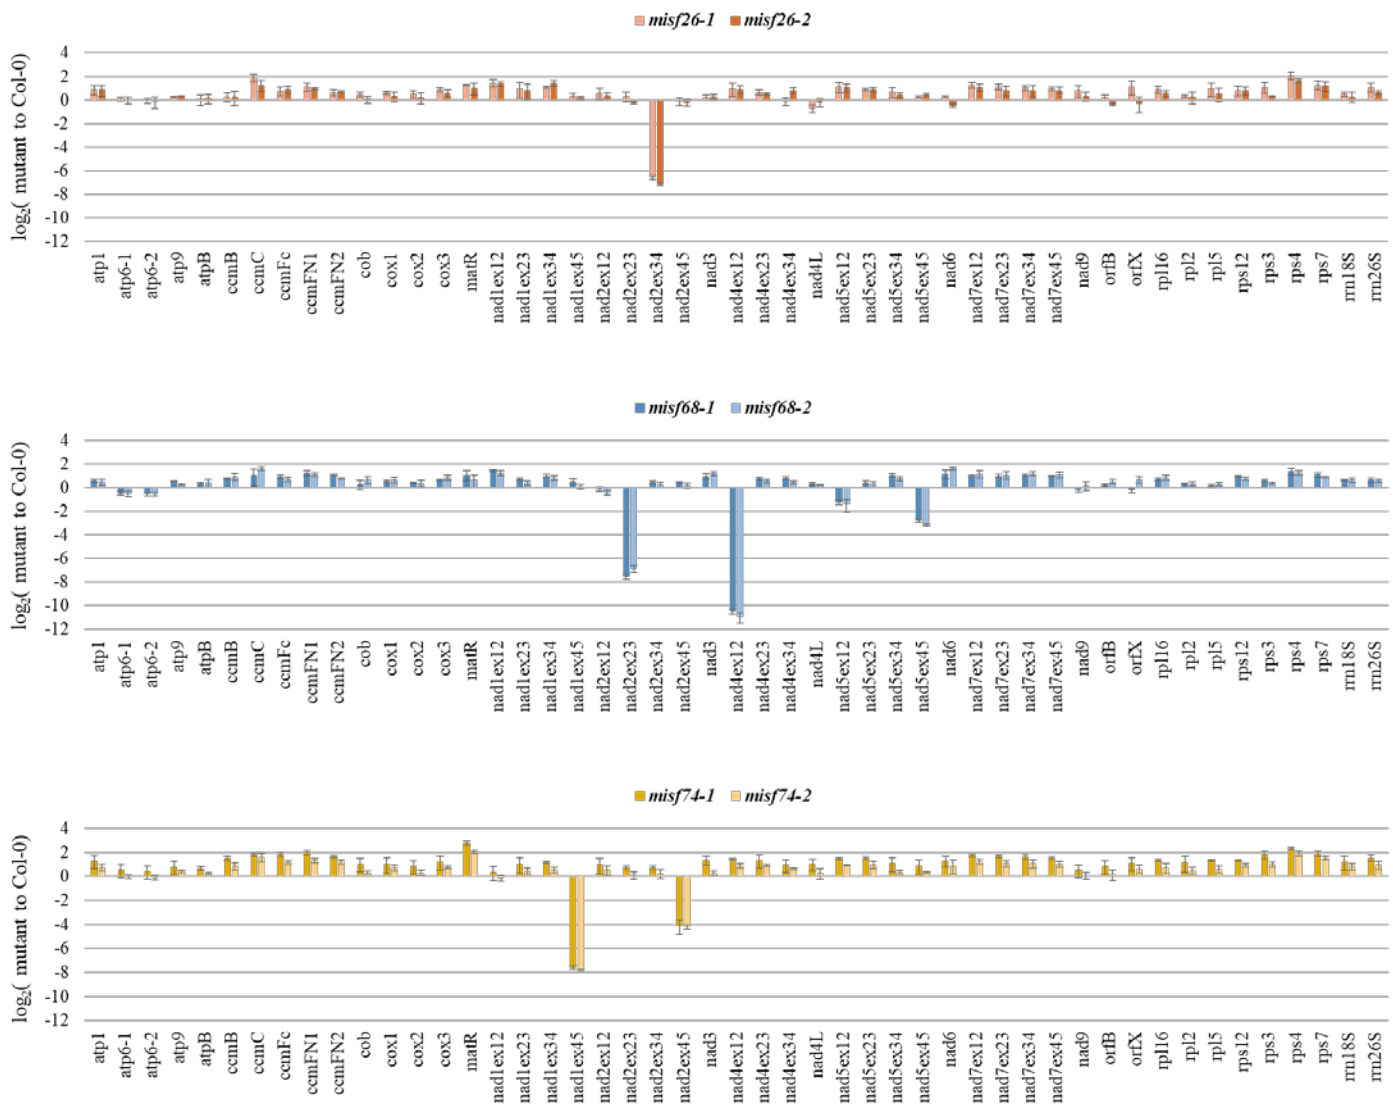

**Supplementary Figure S2: Various mature mitochondrial transcripts under-accumulate in *misf* mutants.** The steady state levels of mature mitochondrial mRNAs measured by quantitative RT-PCR in Col-0 and *misf* mutant plants. The histograms show the  $\log_2$  ratio of mature transcripts in mutants to the wild-type (Col-0). A single PCR was considered for mRNAs carrying no introns, whereas the accumulation of individual exons was analyzed for intron-containing transcripts. Three technical replicates of two independent biological repeats were used for each genotype; standard errors are indicated. The data were normalized to the nuclear 18S rRNA gene.

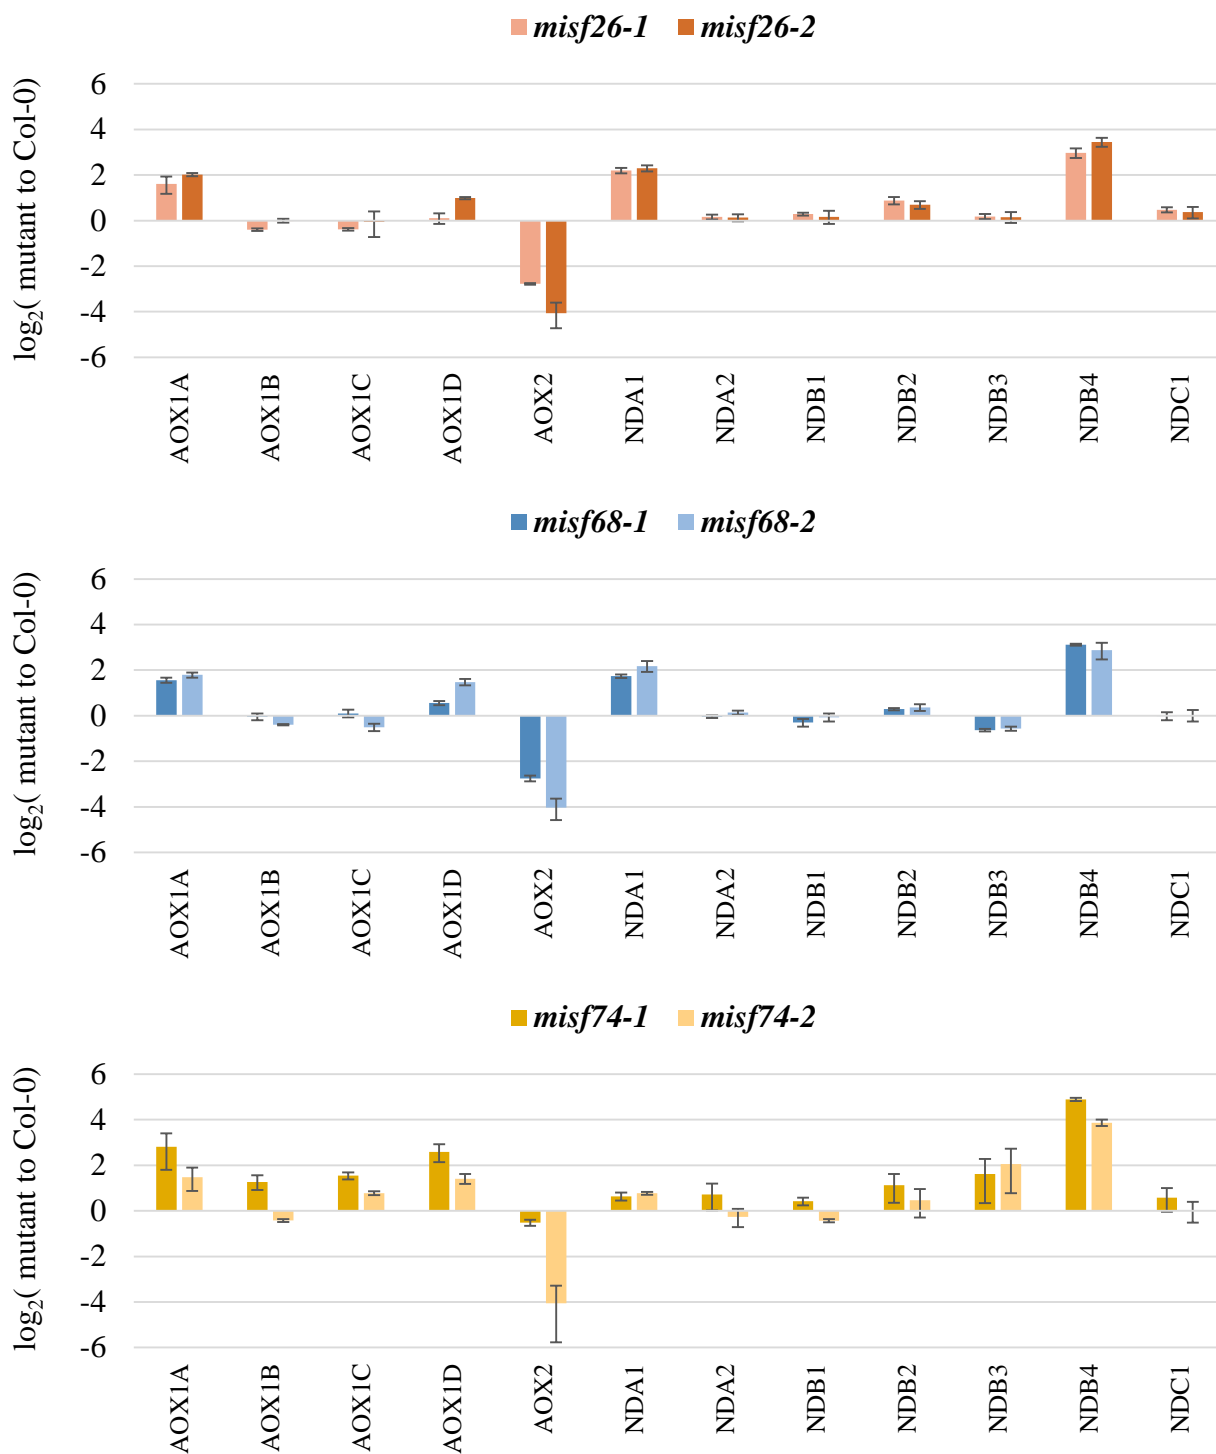

**Supplementary Figure S3: Quantitative RT-PCR measuring the steady-state levels of mRNAs encoding alternative oxidases (AOX) and NADH-dehydrogenases (NDA, NDB and NDC).** Three technical replicates of two independent biological repeats were used for each genotype; standard errors are indicated.

| Family               | PPR  |      |      |        |        |        |       |        |      |       | Maturase |       |       | Helicase |      | CRM   | PORR | RCC1-like | mTERF   | RAD52-like |  |
|----------------------|------|------|------|--------|--------|--------|-------|--------|------|-------|----------|-------|-------|----------|------|-------|------|-----------|---------|------------|--|
|                      | ABO5 | ABO8 | BIR6 | MISF26 | MISF68 | MISF74 | OTP43 | OTP439 | SLO3 | TANG2 | nMAT1    | nMAT2 | nMAT4 | PMH2     | ABO6 | mCSF1 | WF9  | RUG3      | mTERF15 | ODB1       |  |
| splicing factors     |      |      |      |        |        |        |       |        |      |       |          |       |       |          |      |       |      |           |         |            |  |
| <b>nad1 intron 1</b> |      |      |      |        |        |        |       |        |      |       |          |       |       |          |      |       |      |           |         |            |  |
| nad1 intron 2        |      |      |      |        |        |        |       |        |      |       |          |       |       |          |      |       |      |           |         |            |  |
| <b>nad1 intron 3</b> |      |      |      |        |        |        |       |        |      |       |          |       |       |          |      |       |      |           |         |            |  |
| nad1 intron 4        |      |      |      |        |        |        |       |        |      |       |          |       |       |          |      |       |      |           |         |            |  |
| nad2 intron 1        |      |      |      |        |        |        |       |        |      |       |          |       |       |          |      |       |      |           |         |            |  |
| <b>nad2 intron 2</b> |      |      |      |        |        |        |       |        |      |       |          |       |       |          |      |       |      |           |         |            |  |
| nad2 intron 3        |      |      |      |        |        |        |       |        |      |       |          |       |       |          |      |       |      |           |         |            |  |
| nad2 intron 4        |      |      |      |        |        |        |       |        |      |       |          |       |       |          |      |       |      |           |         |            |  |
| nad4 intron 1        |      |      |      |        |        |        |       |        |      |       |          |       |       |          |      |       |      |           |         |            |  |
| nad4 intron 2        |      |      |      |        |        |        |       |        |      |       |          |       |       |          |      |       |      |           |         |            |  |
| nad4 intron 3        |      |      |      |        |        |        |       |        |      |       |          |       |       |          |      |       |      |           |         |            |  |
| group II introns     |      |      |      |        |        |        |       |        |      |       |          |       |       |          |      |       |      |           |         |            |  |
| nad5 intron 1        |      |      |      |        |        |        |       |        |      |       |          |       |       |          |      |       |      |           |         |            |  |
| <b>nad5 intron 2</b> |      |      |      |        |        |        |       |        |      |       |          |       |       |          |      |       |      |           |         |            |  |
| <b>nad5 intron 3</b> |      |      |      |        |        |        |       |        |      |       |          |       |       |          |      |       |      |           |         |            |  |
| nad5 intron 4        |      |      |      |        |        |        |       |        |      |       |          |       |       |          |      |       |      |           |         |            |  |
| nad7 intron 1        |      |      |      |        |        |        |       |        |      |       |          |       |       |          |      |       |      |           |         |            |  |
| nad7 intron 2        |      |      |      |        |        |        |       |        |      |       |          |       |       |          |      |       |      |           |         |            |  |
| nad7 intron 3        |      |      |      |        |        |        |       |        |      |       |          |       |       |          |      |       |      |           |         |            |  |
| nad7 intron 4        |      |      |      |        |        |        |       |        |      |       |          |       |       |          |      |       |      |           |         |            |  |
| ccmFC intron         |      |      |      |        |        |        |       |        |      |       |          |       |       |          |      |       |      |           |         |            |  |
| cox2 intron          |      |      |      |        |        |        |       |        |      |       |          |       |       |          |      |       |      |           |         |            |  |
| rpl2 intron          |      |      |      |        |        |        |       |        |      |       |          |       |       |          |      |       |      |           |         |            |  |
| rps3 intron          |      |      |      |        |        |        |       |        |      |       |          |       |       |          |      |       |      |           |         |            |  |

**Supplementary Figure S4: Listing of known nucleus-encoded proteinaceous factors involved in the splicing of mitochondrial group II introns in Arabidopsis.** Different nucleus-encoded protein factors assisting mitochondrial intron splicing has been identified *via* genetic screens in Arabidopsis so far. Bold black indicate trans-spliced introns. Introns whose splicing is affected by the indicated trans-factors are indicated by orange boxes. Corresponding references are cited in the introduction.

| <b>A</b>                        |     | aa 5       | D   | N   | R   | T   | S   | T   | N   | N   | S | R   | D               |                 |     |     |                 |
|---------------------------------|-----|------------|-----|-----|-----|-----|-----|-----|-----|-----|---|-----|-----------------|-----------------|-----|-----|-----------------|
|                                 |     | aa 35      | S   | N   | S   | D   | N   | Y   | S   | D   | G | N   | R               |                 |     |     |                 |
|                                 |     |            |     |     |     |     |     |     |     |     |   |     |                 |                 |     |     |                 |
|                                 |     | Prediction | N   | C/U | N   | G   | A   | N   | C   | U/C | N | N   | N               | <i>p</i> -value |     |     |                 |
| <b><i>nad2</i><br/>intron 3</b> | BS1 | G          | C   | A   | G   | A   | C   | C   | U   | U   | U | C   |                 | 4.84E-04        |     |     |                 |
|                                 | BS2 | G          | C   | G   | G   | A   | C   | C   | U   | U   | U | U   |                 | 4.84E-04        |     |     |                 |
|                                 | BS3 | G          | C   | G   | G   | A   | G   | C   | C   | C   | G | U   |                 | 8.55E-04        |     |     |                 |
| <b>B</b>                        |     | aa 5       | M   | S   | N   | S   | T   | T   | N   | N   | S | C   | A               | N               | N   | N   |                 |
|                                 |     | aa 35      | S   | T   | D   | T   | T   | D   | T   | S   | C | S   | D               | D               | D   | D   |                 |
|                                 |     |            |     |     |     |     |     |     |     |     |   |     |                 |                 |     |     |                 |
|                                 |     | Prediction | N   | G/U | U/C | G/U | C   | G   | C/U | C   | N | C/U | U/G             | U/C             | U/C | U/C | <i>p</i> -value |
| <b><i>nad2</i><br/>intron 2</b> | BS1 | C          | U   | U   | G   | G   | G   | C   | U   | G   | U | G   | U               | C               | U   |     | 1.35E-04        |
|                                 | BS2 | C          | U   | U   | U   | C   | U   | U   | C   | U   | U | U   | C               | U               | U   |     | 4.18E-04        |
|                                 | BS3 | C          | G   | U   | C   | C   | G   | C   | C   | U   | A | U   | C               | U               | U   |     | 5.53E-04        |
|                                 | BS4 | C          | U   | U   | C   | C   | G   | G   | C   | U   | G | G   | C               | U               | U   |     | 7.44E-04        |
|                                 | BS5 | C          | U   | U   | U   | C   | A   | U   | U   | U   | G | G   | C               | U               | U   |     | 7.55E-04        |
|                                 | BS6 | C          | C   | U   | G   | C   | A   | C   | C   | U   | U | A   | U               | U               | U   |     | 8.48E-04        |
| <b><i>nad4</i><br/>intron 1</b> | BS1 | G          | U   | U   | G   | C   | G   | U   | U   | C   | G | G   | U               | U               | C   |     | 2.19E-04        |
|                                 | BS2 | U          | U   | U   | U   | C   | A   | G   | U   | A   | U | G   | U               | C               | U   |     | 7.97E-04        |
| <b>C</b>                        |     | aa 5       | T   | L   | T   | R   | N   | K   | T   | N   | R | N   |                 |                 |     |     |                 |
|                                 |     | aa 35      | H   | T   | P   | N   | D   | D   | D   | N   | H | H   |                 |                 |     |     |                 |
|                                 |     |            |     |     |     |     |     |     |     |     |   |     |                 |                 |     |     |                 |
|                                 |     | Prediction | A/G | U   | A   | N   | U/C | G/C | G   | C/U | N | C/U | <i>p</i> -value |                 |     |     |                 |
| <b><i>nad1</i> intron 4</b>     | BS1 | G          | U   | A   | G   | U   | C   | G   | G   | C   | C |     | 1.41E-04        |                 |     |     |                 |
| <b><i>nad2</i> intron 4</b>     | BS1 | A          | U   | C   | U   | U   | C   | G   | C   | C   | C |     | 6.82E-04        |                 |     |     |                 |

**Supplementary Figure S5: Predictions of potential RNA target sites for each MISF protein according to the PPR code.** The amino acids at positions 5 and 35 were extracted from each MISF PPR repeat and are listed from N- to C-terminus. These combinations were used to identify potential RNA recognition sites of each MISF protein within their intron targets according to the PPR code. The RNA targets within introns were shown in different background colors, and nucleotides that match the predicted RNA recognition code are marked in red. The *P*-values were determined using the FIMO program as previously described (Wang et al., 2017a). (A), (B) and (C) show the results for MISF26, MISF68 and MISF74, respectively.

A

A.thaliana .....MASALRRLEQQQWRYLVQSQSTRSPKLIHGFFSFSSKTNPNPNKQQQLIDYISKSLQSNDFWETSTHFFSS.....IDLSDSLIETHLIRFK 88  
 B.rapa .....MRHLGKQ.CREFTLISKRSPRRTLGFFSSHSKD.....QQQLLVAISELQNRDNFDTSTHFFSS.....ANLNSLWQDLIRFK 77  
 C.papaya .....MNSIRLPPPISSLITRLLKHTHTQIPNTAT.....TSLSAICDSLRAASNWETLSAIFSS.....IHLTDSLINTLILQK 73  
 T.cacao .....MALLNRRKLGSLV...TSIHNPFCALPKSIIHSHS.LSQLNNDNSIVNSISDSFKKTHNNGRTTKHFFSS.....VQLTHSLQVQLQK 84  
 P.trichocarpa .....MALLRRTPFSLISTPLKYSIHPVCSWFVARELHD...GKTESDTPVSSICDSLRRGYNNDTNRKFFSS.....LQNLNLLKNNVLEK 85  
 E.guttata .....MATFVGIISRKKEPIPFPLIHLTKPELNGNT.....SSSSITSLIDSLHERRSKTKSEKFFSS.....LKFTHQIQVQLQK 78  
 S.bicolor .....MAVNA.....VARRGGG.....LHGRTPASALFTAATHAT.PQHISHYLAHQPRATWEASAFAPAG.....AVSHGHVDAVLLSIA 71  
 Z.mays .....MAVNAG.....GVVARRGGG.....LLGRRPASALSTATTAT.PQHISHYLAHQPRATWEASAFAPAG.....EMSHGHVDAVLLSIA 75  
 O.sativa .....MALIAKSG...GGVLAQRGGGGNLFGLAAASALSASTSTAATTPQRISHYLAHQPRATWEASAFAPAG.....AADH...VDAVLLSIA 80  
 S.italica MTVRSWGLSMALHAANCGRVARRG.....LGRALASALL.CTTATT.PQRISHYLAHQPRATWEASAFAPAG...GGAVPHGQVDAVLLSIA 87  
 B.distachyon .....MAAKSG...GRLVARRGG.....AAVCAAAATALPTSTTAS..PQHIAHYLAHNPRVTEASAFAPAG...EPTAAVAAAAPDRQVDAVLLSIA 80

A.thaliana NPET.....AKCAHSFFWSSHTRNLRHG.....IKSYALTHIVVARRLILARALIESSLN.....SPDSDLVSLDLYEIS. 160  
 B.rapa HPET.....AKRATFFWSSHARNLRHG.....VSSYALTHIVVARRLILARALIESSLN.....SSPDSLDDSLDLYEVS. 149  
 C.papaya EPTD.....AKRAGFFWSSAKTKNHPHG.....IRSYIAIHLVARRLILARALIESSLKNTVIVH.GSREKFSVSLDLYEIVT. 151  
 T.cacao QPEH.....ARSALNFFWSSAKSQNFKHQ.....IYSYIAIHLVHAKQLPBAKILHSAKLTSA...DSTRSCILESLDLYEIVV. 159  
 P.trichocarpa EPTD.....AKRAGFFWSSAR.RNFVHG.....VQSYCLMHIIDQARIMDAQALLESLLKRSVG...DPTKFLVLSLSSYKII. 159  
 E.guttata EFIN.....SRKANFFWSSRKMNFVHG.....LSTYCLMHIIDQARIKAKALIESSLIKDFD.D.GDSRMLDVLSDLYEIV. 155  
 S.bicolor RHPHASP.....PVRKNAFFWSSAAAASSSS.....HSLRSYCLLVHLSRAAFRNASVLESAISRHSSSS...AFASCFILFFAAYEDSG 155  
 Z.mays RHPHASP.....PVRKNAFFWSSAAAASSSSPPPPSSSHLSRSYCLLVHLSRAAFRNASVLESAISRHSSSS...AFASCFILFFAAYEDSG 167  
 O.sativa KHLHSSSSSYSPELVARNALFFWSSAAAASSSSST.....PHTLRAYCLLVHLSRAAFIRNASVLESAIAKHSSSS...PASAFILFFAAYEDSG 169  
 S.italica RHPHASP.....PVRKNAFFWSSAAAAVAVLPS.....SSHLSRSYCLLVHLSRAAFRNASVLESAIAKHSSSS...VPASSFLFFAAYEDSG 176  
 B.distachyon KNSSPSSS...ETIAKNAHSFFWSSAAAASSPS.....PHLSRSYCLLVHLSRAAFIRNASVLESAIAKHSSSS...PASSFLFFAAYEDSG 164

A.thaliana .SSTPLVFDLIVQCAKIRYLELGFDFVKRCDGQFTLVSITNTLIIYSSKSKIDDLVIRIMECAIDARIVENEITRIMIQVLCRGRIRKVEVVDLLDR 259  
 B.rapa .CSTPLAFDILVQCAKIRLLELGSDFVKNITDRGFSLSVITNTLIIHVSQSNRIDLVIRIMEAIVDARVINEITRIMISALCKEGRIRKVEVLDK 248  
 C.papaya .NSIPLVLDLIVQCAKIRMIIEIGFDVRRIDEHGFTLVSISNLLIVVQKSDRNDLVIRIMEHIERIVINEITRIMVSALCKEGRIRKVEVLDK 250  
 T.cacao .GSSPLVFDLIVQCAKIRLLELGFDFVKRCDGQFTLVSITNTLIIHVSQSNRIDLVIRIMEAIVDARVINEITRIMISALCKEGRIRKVEVLDK 258  
 P.trichocarpa .ISSPLVFDLIVQCAKIRMIIEIGFDVRRIDEHGFTLVSISNLLIVVQKSDKSPKAKIYEHMLHRTVINEATIESMISALCKEGRIRKVEVLDK 258  
 E.guttata .ESVPLVFDLIVQCAKIRRMVDDIDAKKIRSHDFPLSVISNTLIIHVMIKSEKRLVSVYEHMISBRMCPNEMTRIMVSALCKEGRIRKVEVLDK 254  
 S.bicolor TAAITRGLHLIVHAYARARLPEALEAQRVYIARRGVPLSLSAANAALAAQAQSGFVAVVEVHELMTLQRVYMANQSTVELVIGVLSREGALARTALVER 265  
 Z.mays TAAITRGLHLIVHAYARARLPEALEAQRVYIARRGVPLSLSAANAALAAQAQSGFVAVVEVHELMTLQRVYMANQSTVELVIGVLSREGALARTALVER 257  
 O.sativa TAAITRGLHLIVHAYARARLPEALEAQRVYIARRGVVPLSLSAANAALAAQAQSGFVAVVEVHELMTLQRVYMANQSTVELVIGVLSREGALARTALVER 269  
 S.italica TAAITRGLHLIVHAYARARLPEALEAQRVYIARRGVPLSLSAANAALAAQAQSGFVAVVEVHELMTLQRVYMANQSTVELVIGVLSREGALARTALVER 276  
 B.distachyon TAAITRGLHLIVHAYARARLPEALEAQRVYIARRGVPLSLSAANAALAAQAQSGFVAVVEVHELMTLQRVYMANQSTVELVIGVLSREGALARTALVER 264

A.thaliana IICGRQL.FSIVVNTSLVFRVLEEMRIEESMSLKRLLMKNMVVDITIGSIVVYAKAREGDIVSARKVFDMLQRGFSANFSVYIVFVRVCEKEDVKEA 358  
 B.rapa IICGRCS.FPVIIVNTSLVFRVLEEMRIEESMSLKRLLMKNMVVDITIGSIVVYAKAREGDIVSARKVFDMLQRGFSANFSVYIVFVRVCEKEDVKEA 347  
 C.papaya IICGRCS.FPVIIVNTSLVFRVLEEMRIEESMSLKRLLMKNMVVDITIGSIVVYAKAREGDIVSARKVFDMLQRGFSANFSVYIVFVRVCEKEDVKEA 349  
 T.cacao IICGRCS.FPVIIVNTSLVFRVLEEMRIEESMSLKRLLMKNMVVDITIGSIVVYAKAREGDIVSARKVFDMLQRGFSANFSVYIVFVRVCEKEDVKEA 357  
 P.trichocarpa IICGRCS.FPVIIVNTSLVFRVLEEMRIEESMSLKRLLMKNMVVDITIGSIVVYAKAREGDIVSARKVFDMLQRGFSANFSVYIVFVRVCEKEDVKEA 357  
 E.guttata IICGRCS.FPVIIVNTSLVFRVLEEMRIEESMSLKRLLMKNMVVDITIGSIVVYAKAREGDIVSARKVFDMLQRGFSANFSVYIVFVRVCEKEDVKEA 354  
 S.bicolor IICGRCS.FPVIIVNTSLVFRVLEEMRIEESMSLKRLLMKNMVVDITIGSIVVYAKAREGDIVSARKVFDMLQRGFSANFSVYIVFVRVCEKEDVKEA 354  
 Z.mays IICGRCS.FPVIIVNTSLVFRVLEEMRIEESMSLKRLLMKNMVVDITIGSIVVYAKAREGDIVSARKVFDMLQRGFSANFSVYIVFVRVCEKEDVKEA 356  
 O.sativa IICGRCS.FPVIIVNTSLVFRVLEEMRIEESMSLKRLLMKNMVVDITIGSIVVYAKAREGDIVSARKVFDMLQRGFSANFSVYIVFVRVCEKEDVKEA 364  
 S.italica IICGRCS.FPVIIVNTSLVFRVLEEMRIEESMSLKRLLMKNMVVDITIGSIVVYAKAREGDIVSARKVFDMLQRGFSANFSVYIVFVRVCEKEDVKEA 368  
 B.distachyon IICGRCS.FPVIIVNTSLVFRVLEEMRIEESMSLKRLLMKNMVVDITIGSIVVYAKAREGDIVSARKVFDMLQRGFSANFSVYIVFVRVCEKEDVKEA 375

A.thaliana ERLLSEMEESVSRFYDETENCIGCFAR.FEWEKGLKEYCEVVTFRGLMESCASFNEVNVKSVSKIENVRANEITTKSIDHGFVEDEHTYSHLIRGFIEG 457  
 B.rapa EKLIAMESSVSRFYDETENCIGCFAR.FEWEKGLKEYCEVVTFRGLMESCASFNEVNVKSVSKIENVRANEITTKSIDHGFVEDEHTYSHLIRGFIEG 446  
 C.papaya NRIIDEMEIMGLPYDETENHILHGOAR.AGRVEESNLCEMVKQTLBSCSAFNEVLEKVNAIEDLRANGLITILLEAGFIPDEITYSHLIRGHVKG 448  
 T.cacao ENVLREMNGLPYDETENHILHGOAR.AGRVEESNLCEMVKQTLBSCSAFNEVLEKVNAIEDLRANGLITILLEAGFIPDEITYSHLIRGHVKG 456  
 P.trichocarpa NQIQEMLKPLPYDETENHILHGOAR.AGRVEESNLCEMVKQTLBSCSAFNEVLEKVNAIEDLRANGLITILLEAGFIPDEITYSHLIRGHVKG 456  
 E.guttata VGLFBEESLGLPYDETENHILHGOAR.AGRVEESNLCEMVKQTLBSCSAFNEVLEKVNAIEDLRANGLITILLEAGFIPDEITYSHLIRGHVKG 454  
 S.bicolor AQLHCEMLSMGAPYDATYNHILHGOAR.CQMKEGLAYFDNHEEGFVLDIGSCNEMLEGLCNAEVEHRRANVITAMMDGLLPPQDITYSHLIRGHVKG 453  
 Z.mays AQLHCEMLSMGAPYDATYNHILHGOAR.CQMKEGLAYFDNHEEGFVLDIGSCNEMLEGLCNAEVEHRRANVITAMMDGLLPPQDITYSHLIRGHVKG 465  
 O.sativa MQLFBEESLGLPYDATYNHILHGOAR.CQMKEGLAYFDNHEEGFVLDIGSCNEMLEGLCNAEVEHRRANVITAMMDGLLPPQDITYSHLIRGHVKG 467  
 S.italica MQLFBEESLGLPYDATYNHILHGOAR.CQMKEGLAYFDNHEEGFVLDIGSCNEMLEGLCNAEVEHRRANVITAMMDGLLPPQDITYSHLIRGHVKG 474  
 B.distachyon MQLFBEESLGLPYDATYNHILHGOAR.CQMKEGLAYFDNHEEGFVLDIGSCNEMLEGLCNAEVEHRRANVITAMMDGLLPPQDITYSHLIRGHVKG 462

A.thaliana NDIDQALFLYEMERYKMSPGFEVFRSIVGICCKRVEAGERYLKIMKKRLIEENADIDALAKAFQIGDKTNADRVYNEISVSR..... 544  
 B.rapa NDIEQALFLYEMERYKMSPGFEVFRSIVGICCKRVEAGERYFRIMKRLIQENAEINAEALAKAFRTDKNTNADRVYNEISVSR..... 533  
 C.papaya GEVEEAFKLYEMERYKMSPGFEVFRSIVGICCKRVEAGERYFRIMKDRFMVSVVDVHAAVGSYCRKGDKKRAGVYVREMMSEGLNPSGLYDLEDSE 548  
 T.cacao GNIQOQVFLYEMERYKMSPGFEVFRSIVGICCKRVEAGERYFRIMKDRSIVLSEIDNEALITGHFEKGDGTAGIYNEVARGMRFHWGNFTKEV 556  
 P.trichocarpa NQIQEMLKPLPYDETENHILHGOAR.AGRVEESNLCEMVKQTLBSCSAFNEVLEKVNAIEDLRANGLITILLEAGFIPDEITYSHLIRGHVKG 556  
 E.guttata DDEVLGLFLYEMERYKMSPGFEVFRSIVGICCKRVEAGERYFRIMKDRSIVLSEIDNEALITGHFEKGDGTAGIYNEVARGMRFHWGNFTKEV 541  
 S.bicolor GNAQGVNLYHEMHRGLDPVEVFTLTKGICCGNLKEAEFFIMMKKKTVAITSDLDMLISGCEKRNKRALWLYDMVAMNERLVPASAEFTMML 553  
 Z.mays GNAQGVNLYHEMHRGLDPVEVFTLTKGICCGNLKEAEFFIMMKKKTVAITSDLDMLISGCEKRNKRALWLYDMVAMNERLVPASAEFTMML 565  
 O.sativa GDAQGIILYHEMHRGLNIGVDVSSILRACCGDGLKEAEFFLAILERKLLATSEINDLISGNCCKGNTKRALWYDMVAMNERLVPASAEFTMML 567  
 S.italica GDAEIVRYHEMHRGLNIGVDVSSILRACCGDGLKEAEFFLAILERKLLATSEINDLISGNCCKGNTKRALWYDMVAMNERLVPASAEFTMML 574  
 B.distachyon GDSQGIILYHEMHRGLNIGVDVSSILRACCGDGLKEAEFFLAILERKLLATSEINDLISGNCCKGNTKRALWYDMVAMNERLVPASAEFTMML 562

A.thaliana ..... 544  
 B.rapa ..... 533  
 C.papaya TVNMKALSQAQKIEYR... 564  
 T.cacao TSMKDIAKTIPER... 569  
 P.trichocarpa ..... 556  
 E.guttata ..... 541  
 S.bicolor VRRVIKVNVCSPDS. 568  
 Z.mays VRRVIKVNNTYSPDS. 580  
 O.sativa VRRVIKPKSTCSPNC. 582  
 S.italica VRRVIKVNYPNN. 589  
 B.distachyon VRRVIRVTTCSPT. 577

B

A.thaliana .....MMYVSARS....GSARRSSTSLRHSORFHOTENEIVGMPSTVNH...ESEKPEQEKWKLSDKFSVRMIDERFIRIVKIFKVGDAE 81  
 B.rapa .....MAYITRSR....ILVRRSVSTLPHDSORFHOTENEIVGMPSTVNH...EYENPEQEKWKLSDKFSVRMIDERFIRIVKIFKVGDAE 81  
 C.papaya .....MVVRS....FVLRHSTSLRHSORFHOTENEIVGMPSTVNH...DNRVENLPMNR.KLLRDLRVRIDERFIRIVKIFKVGDAE 79  
 T.cacao .....MRTMPS....SALRRSSTSLRHSORFHOTENEIVGMPSTVNH...KKAQDLAVKR.KKP...SVRTIDERFIRIVKIFKVGDAE 77  
 P.trichocarpa .....MVVLRH....IASRRSSTSLRHSORFHOTENEIVGMPSTVNH...KKAQDLAVKR.KKP...SVRTIDERFIRIVKIFKVGDAE 82  
 E.guttata .....MRVEGKMLAKS....IASSRSTSLRHSORFHOTENEIVGMPSTVNH...KKAQDLAVKR.KKP...SVRTIDERFIRIVKIFKVGDAE 84  
 S.bicolor .....MARRG...VQLLVARGSSSPGSRRIHOTENEIVGMPSTVNH...QSEEAIAITVP...HYTSVRVIDERFIRIVKIFKVGDAE 78  
 Z.mays .....MMTRCG...VQLLVARGSSSPGSRRIHOTENEIVGMPSTVNH...QSEEAIAITVP...HYTSVRVIDERFIRIVKIFKVGDAE 79  
 O.sativa .....MASRAP...CLLAVRGSASSPGLARRHOTENEIVGMPSTVNH...RNEDAVAALSP...HYTSVRVIDERFIRIVKIFKVGDAE 78  
 S.italica .....MARRG...AQLLARRSSTSLRHSORFHOTENEIVGMPSTVNH...QSEEAIAITVP...HYTSVRVIDERFIRIVKIFKVGDAE 78  
 B.distachyon MVTACAVTAPATVPVPLPSPPHRSRRRPEMARLLAVRGSASSPGLARRHOTENEIVGMPSTVNH...RSEEAIVAPIER...HYTSVRVIDERFIRIVKIFKVGDAE 105

A.thaliana .....ALEVLRVVDLRLRVEVLDLDELINVRILFFWAKGRFNEFHCHCSTYTLRCLCEARLYGCVYRTOEIVNTYVSVSFAVLSLVRALGPAKMYKSAISVFGARGR 191  
 B.rapa .....ALEVLRVVDLRLRVEVLDLDELINVRILFFWAKGRFNEFHCHCSTYTLRCLCEARLYGCVYRTOEIVNTYVSVSFAVLSLVRALGPAKMYKSAISVFGARGR 191  
 C.papaya .....ALEVLRVVDLRLRVEVLDLDELINVRILFFWAKGRFNEFHCHCSTYTLRCLCEARLYGCVYRTOEIVNTYVSVSFAVLSLVRALGPAKMYKSAISVFGARGR 191  
 T.cacao .....ALEVLRVVDLRLRVEVLDLDELINVRILFFWAKGRFNEFHCHCSTYTLRCLCEARLYGCVYRTOEIVNTYVSVSFAVLSLVRALGPAKMYKSAISVFGARGR 191  
 P.trichocarpa .....ALEVLRVVDLRLRVEVLDLDELINVRILFFWAKGRFNEFHCHCSTYTLRCLCEARLYGCVYRTOEIVNTYVSVSFAVLSLVRALGPAKMYKSAISVFGARGR 191  
 E.guttata .....ALEVLRVVDLRLRVEVLDLDELINVRILFFWAKGRFNEFHCHCSTYTLRCLCEARLYGCVYRTOEIVNTYVSVSFAVLSLVRALGPAKMYKSAISVFGARGR 191  
 S.bicolor .....ALEVLRVVDLRLRVEVLDLDELINVRILFFWAKGRFNEFHCHCSTYTLRCLCEARLYGCVYRTOEIVNTYVSVSFAVLSLVRALGPAKMYKSAISVFGARGR 191  
 Z.mays .....ALEVLRVVDLRLRVEVLDLDELINVRILFFWAKGRFNEFHCHCSTYTLRCLCEARLYGCVYRTOEIVNTYVSVSFAVLSLVRALGPAKMYKSAISVFGARGR 191  
 O.sativa .....ALEVLRVVDLRLRVEVLDLDELINVRILFFWAKGRFNEFHCHCSTYTLRCLCEARLYGCVYRTOEIVNTYVSVSFAVLSLVRALGPAKMYKSAISVFGARGR 191  
 S.italica .....ALEVLRVVDLRLRVEVLDLDELINVRILFFWAKGRFNEFHCHCSTYTLRCLCEARLYGCVYRTOEIVNTYVSVSFAVLSLVRALGPAKMYKSAISVFGARGR 191  
 B.distachyon .....ALEVLRVVDLRLRVEVLDLDELINVRILFFWAKGRFNEFHCHCSTYTLRCLCEARLYGCVYRTOEIVNTYVSVSFAVLSLVRALGPAKMYKSAISVFGARGR 215

A.thaliana .....CKPSTSTYNSVIMLHQGCHHEKVHELYNEMCNEG.HCPDITVYSALISYKLRNDSAIRFEEMDNCMCPKRIYTHLGLVYFKVGGVERALDFFEMKRAKGS 300  
 B.rapa .....CKPSTSTYNSVIMLHQGCHHEKVHELYNEMCNEG.HCPDITVYSALISYKLRNDSAIRFEEMDNCMCPKRIYTHLGLVYFKVGGVERALDFFEMKRAKGS 300  
 C.papaya .....CKPSTSTYNSVIMLHQGCHHEKVHELYNEMCNEG.HCPDITVYSALISYKLRNDSAIRFEEMDNCMCPKRIYTHLGLVYFKVGGVERALDFFEMKRAKGS 300  
 T.cacao .....CKPSTSTYNSVIMLHQGCHHEKVHELYNEMCNEG.HCPDITVYSALISYKLRNDSAIRFEEMDNCMCPKRIYTHLGLVYFKVGGVERALDFFEMKRAKGS 300  
 P.trichocarpa .....CKPSTSTYNSVIMLHQGCHHEKVHELYNEMCNEG.HCPDITVYSALISYKLRNDSAIRFEEMDNCMCPKRIYTHLGLVYFKVGGVERALDFFEMKRAKGS 300  
 E.guttata .....CKPSTSTYNSVIMLHQGCHHEKVHELYNEMCNEG.HCPDITVYSALISYKLRNDSAIRFEEMDNCMCPKRIYTHLGLVYFKVGGVERALDFFEMKRAKGS 300  
 S.bicolor .....CKPSTSTYNSVIMLHQGCHHEKVHELYNEMCNEG.HCPDITVYSALISYKLRNDSAIRFEEMDNCMCPKRIYTHLGLVYFKVGGVERALDFFEMKRAKGS 300  
 Z.mays .....CKPSTSTYNSVIMLHQGCHHEKVHELYNEMCNEG.HCPDITVYSALISYKLRNDSAIRFEEMDNCMCPKRIYTHLGLVYFKVGGVERALDFFEMKRAKGS 300  
 O.sativa .....CKPSTSTYNSVIMLHQGCHHEKVHELYNEMCNEG.HCPDITVYSALISYKLRNDSAIRFEEMDNCMCPKRIYTHLGLVYFKVGGVERALDFFEMKRAKGS 300  
 S.italica .....CKPSTSTYNSVIMLHQGCHHEKVHELYNEMCNEG.HCPDITVYSALISYKLRNDSAIRFEEMDNCMCPKRIYTHLGLVYFKVGGVERALDFFEMKRAKGS 300  
 B.distachyon .....CKPSTSTYNSVIMLHQGCHHEKVHELYNEMCNEG.HCPDITVYSALISYKLRNDSAIRFEEMDNCMCPKRIYTHLGLVYFKVGGVERALDFFEMKRAKGS 324

A.thaliana .....ETVVTYTELRIGCGGRVDEAYGEYKMLRDLPLDVLVFNLMNIIIGVGRVEELTNVSEEMGMWRCHTIVSVSYVIRKAFESKAVHSEVSWEDRKAADSVSPSEF 410  
 B.rapa .....ETVVTYTELRIGCGGRVDEAYGEYKMLRDLPLDVLVFNLMNIIIGVGRVEELTNVSEEMGMWRCHTIVSVSYVIRKAFESKAVHSEVSWEDRKAADSVSPSEF 410  
 C.papaya .....ETVVTYTELRIGCGGRVDEAYGEYKMLRDLPLDVLVFNLMNIIIGVGRVEELTNVSEEMGMWRCHTIVSVSYVIRKAFESKAVHSEVSWEDRKAADSVSPSEF 410  
 T.cacao .....ETVVTYTELRIGCGGRVDEAYGEYKMLRDLPLDVLVFNLMNIIIGVGRVEELTNVSEEMGMWRCHTIVSVSYVIRKAFESKAVHSEVSWEDRKAADSVSPSEF 410  
 P.trichocarpa .....ETVVTYTELRIGCGGRVDEAYGEYKMLRDLPLDVLVFNLMNIIIGVGRVEELTNVSEEMGMWRCHTIVSVSYVIRKAFESKAVHSEVSWEDRKAADSVSPSEF 410  
 E.guttata .....ETVVTYTELRIGCGGRVDEAYGEYKMLRDLPLDVLVFNLMNIIIGVGRVEELTNVSEEMGMWRCHTIVSVSYVIRKAFESKAVHSEVSWEDRKAADSVSPSEF 410  
 S.bicolor .....ETVVTYTELRIGCGGRVDEAYGEYKMLRDLPLDVLVFNLMNIIIGVGRVEELTNVSEEMGMWRCHTIVSVSYVIRKAFESKAVHSEVSWEDRKAADSVSPSEF 410  
 Z.mays .....ETVVTYTELRIGCGGRVDEAYGEYKMLRDLPLDVLVFNLMNIIIGVGRVEELTNVSEEMGMWRCHTIVSVSYVIRKAFESKAVHSEVSWEDRKAADSVSPSEF 410  
 O.sativa .....ETVVTYTELRIGCGGRVDEAYGEYKMLRDLPLDVLVFNLMNIIIGVGRVEELTNVSEEMGMWRCHTIVSVSYVIRKAFESKAVHSEVSWEDRKAADSVSPSEF 410  
 S.italica .....ETVVTYTELRIGCGGRVDEAYGEYKMLRDLPLDVLVFNLMNIIIGVGRVEELTNVSEEMGMWRCHTIVSVSYVIRKAFESKAVHSEVSWEDRKAADSVSPSEF 410  
 B.distachyon .....ETVVTYTELRIGCGGRVDEAYGEYKMLRDLPLDVLVFNLMNIIIGVGRVEELTNVSEEMGMWRCHTIVSVSYVIRKAFESKAVHSEVSWEDRKAADSVSPSEF 434

A.thaliana .....TYSIIDGCKNRVEKALLLEEMDEHGFPFPAAAYCSLINDLGRAKRYEAARELEKELKENFNVSSRYAVMIKIHGRCGLSEAVDLEEMKKGSGGPPVYVYNAL 520  
 B.rapa .....TYSIIDGCKNRVEKALLLEEMDEHGFPFPAAAYCSLINDLGRAKRYEAARELEKELKENFNVSSRYAVMIKIHGRCGLSEAVDLEEMKKGSGGPPVYVYNAL 520  
 C.papaya .....TYSIIDGCKNRVEKALLLEEMDEHGFPFPAAAYCSLINDLGRAKRYEAARELEKELKENFNVSSRYAVMIKIHGRCGLSEAVDLEEMKKGSGGPPVYVYNAL 520  
 T.cacao .....TYSIIDGCKNRVEKALLLEEMDEHGFPFPAAAYCSLINDLGRAKRYEAARELEKELKENFNVSSRYAVMIKIHGRCGLSEAVDLEEMKKGSGGPPVYVYNAL 520  
 P.trichocarpa .....TYSIIDGCKNRVEKALLLEEMDEHGFPFPAAAYCSLINDLGRAKRYEAARELEKELKENFNVSSRYAVMIKIHGRCGLSEAVDLEEMKKGSGGPPVYVYNAL 520  
 E.guttata .....TYSIIDGCKNRVEKALLLEEMDEHGFPFPAAAYCSLINDLGRAKRYEAARELEKELKENFNVSSRYAVMIKIHGRCGLSEAVDLEEMKKGSGGPPVYVYNAL 520  
 S.bicolor .....TYSIIDGCKNRVEKALLLEEMDEHGFPFPAAAYCSLINDLGRAKRYEAARELEKELKENFNVSSRYAVMIKIHGRCGLSEAVDLEEMKKGSGGPPVYVYNAL 520  
 Z.mays .....TYSIIDGCKNRVEKALLLEEMDEHGFPFPAAAYCSLINDLGRAKRYEAARELEKELKENFNVSSRYAVMIKIHGRCGLSEAVDLEEMKKGSGGPPVYVYNAL 520  
 O.sativa .....TYSIIDGCKNRVEKALLLEEMDEHGFPFPAAAYCSLINDLGRAKRYEAARELEKELKENFNVSSRYAVMIKIHGRCGLSEAVDLEEMKKGSGGPPVYVYNAL 520  
 S.italica .....TYSIIDGCKNRVEKALLLEEMDEHGFPFPAAAYCSLINDLGRAKRYEAARELEKELKENFNVSSRYAVMIKIHGRCGLSEAVDLEEMKKGSGGPPVYVYNAL 520  
 B.distachyon .....TYSIIDGCKNRVEKALLLEEMDEHGFPFPAAAYCSLINDLGRAKRYEAARELEKELKENFNVSSRYAVMIKIHGRCGLSEAVDLEEMKKGSGGPPVYVYNAL 544

A.thaliana .....MSGVVRAGINAEASLIRKVEENCGIARVNSHNINLNGARAGCAARFAEMFETIHSGIKRFDVYNTVLCFAHGMEEBAAKMMEMKDKGCFYDIIPYSSILRAI 629  
 B.rapa .....MSGVVRAGINAEASLIRKVEENCGIARVNSHNINLNGARAGCAARFAEMFETIHSGIKRFDVYNTVLCFAHGMEEBAAKMMEMKDKGCFYDIIPYSSILRAI 629  
 C.papaya .....MSGVVRAGINAEASLIRKVEENCGIARVNSHNINLNGARAGCAARFAEMFETIHSGIKRFDVYNTVLCFAHGMEEBAAKMMEMKDKGCFYDIIPYSSILRAI 629  
 T.cacao .....MSGVVRAGINAEASLIRKVEENCGIARVNSHNINLNGARAGCAARFAEMFETIHSGIKRFDVYNTVLCFAHGMEEBAAKMMEMKDKGCFYDIIPYSSILRAI 629  
 P.trichocarpa .....MSGVVRAGINAEASLIRKVEENCGIARVNSHNINLNGARAGCAARFAEMFETIHSGIKRFDVYNTVLCFAHGMEEBAAKMMEMKDKGCFYDIIPYSSILRAI 629  
 E.guttata .....MSGVVRAGINAEASLIRKVEENCGIARVNSHNINLNGARAGCAARFAEMFETIHSGIKRFDVYNTVLCFAHGMEEBAAKMMEMKDKGCFYDIIPYSSILRAI 629  
 S.bicolor .....MSGVVRAGINAEASLIRKVEENCGIARVNSHNINLNGARAGCAARFAEMFETIHSGIKRFDVYNTVLCFAHGMEEBAAKMMEMKDKGCFYDIIPYSSILRAI 629  
 Z.mays .....MSGVVRAGINAEASLIRKVEENCGIARVNSHNINLNGARAGCAARFAEMFETIHSGIKRFDVYNTVLCFAHGMEEBAAKMMEMKDKGCFYDIIPYSSILRAI 629  
 O.sativa .....MSGVVRAGINAEASLIRKVEENCGIARVNSHNINLNGARAGCAARFAEMFETIHSGIKRFDVYNTVLCFAHGMEEBAAKMMEMKDKGCFYDIIPYSSILRAI 629  
 S.italica .....MSGVVRAGINAEASLIRKVEENCGIARVNSHNINLNGARAGCAARFAEMFETIHSGIKRFDVYNTVLCFAHGMEEBAAKMMEMKDKGCFYDIIPYSSILRAI 629  
 B.distachyon .....MSGVVRAGINAEASLIRKVEENCGIARVNSHNINLNGARAGCAARFAEMFETIHSGIKRFDVYNTVLCFAHGMEEBAAKMMEMKDKGCFYDIIPYSSILRAI 653

A.thaliana .....KNVHEKDDVSS 641  
 B.rapa .....KNVHVKDVL.. 640  
 C.papaya .....KNVDEHNPVI.. 637  
 T.cacao .....KNVIEDRSLSLF 636  
 P.trichocarpa .....KNVIEDDEPNFP 641  
 E.guttata .....KNVIEDCKLVSS 645  
 S.bicolor .....KNVIEHYTGQGC 645  
 Z.mays .....KNVIEHCDP... 638  
 O.sativa .....KNVIEOE..... 632  
 S.italica .....KNVIEHE..... 632  
 B.distachyon .....KNVIEHE..... 659



C

|               |                                                                                      |    |
|---------------|--------------------------------------------------------------------------------------|----|
| A.thaliana    | MIRRPIDFAAV.....FRHLTSPSTSSRFLLFYSSEHEARKPIVSN.....PKSPICSTFTVCKLIASQSDPLLAREIFD     | 72 |
| B.rapa        | MIRRIQNSSAV.....SRHLTSPISLFSRFLFSSSENNTHPEIVSNRN.....PKSPFCSFTVCKLIASQSDPLLAREIFD    | 74 |
| C.papaya      | MQRLLNSSKAMITLT...SSHFTFLPKSLIFFYSYSPESPQKNQQQLSSASASAN...SAIGSFTVCKLIASQSDPLLAREIFD | 83 |
| P.trichocarpa | MHKPFLVCKILLTTPPRTTRVPLPKQSLFFYSSSHIIHQHRELEPDSHPNANT...KSPICSTFTVCKLIASQSDPLLAREIFD | 88 |
| T.cacao       | MQQALFSSSKTV.....SRSLTFPPKPPFLFRSSSSSPGPPHKKQ.....PPRTC.TSAIGSPARVFKLIASQSDPLLAREIFD | 74 |
| E.guttata     | MYHASLS.....YSLLSKVRKPSFYCLTTLSSHQKQEPNDRFRNEKQEPKVDKQPSIGSPARICKLIASQSDPLLAREIFD    | 78 |
| S.bicolor     | .....MLSPPK.....ISPARLHKIVTSCDPLLARELVT                                              | 31 |
| Z.mays        | .....MLSPPPA.....TSPARLHKIVTSCDPLLARELVN                                             | 31 |
| S.italica     | .....MLSPPPA.....ISPARLHKIVTSCDPLLARELVT                                             | 31 |
| B.distachyon  | .....MLSPPPA.....ISPARLHKIVTSCDPLLARELVT                                             | 31 |
| O.sativa      | .....MLSPRAPP.....ISPARLHKIVTSCDPLLARELVT                                            | 34 |

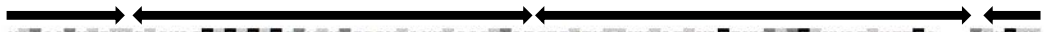

|               |                                                                                              |     |
|---------------|----------------------------------------------------------------------------------------------|-----|
| A.thaliana    | YASQCENFRHRSSSHLLILKIKGRCYFNIDVDLAKHRSSGYLTGEIFTYLIKVYAEAKLPEKVLSTFYKMLEFNFTFQ...PKHLNR      | 159 |
| B.rapa        | YASQHSERHRSQSSHLVLLKIGRSRHFNIIDVDLAKHRSSGYVVTGELFTYLIKVYAEAELEPKAKTFYKMLEFNFTFQ...PKHLNR     | 161 |
| C.papaya      | YAFRQOQGERHSYSSYLILKIKGRCYFNIIDVDLILSLKTKQRYITPILFSYVVKIYAEADLPKALKTFFYKIRFEGCFL...PKHLNR    | 170 |
| P.trichocarpa | YASRQNEQHSYSSYLILKIKGRCYFNFIDVDLLDLKSKNYVVTQTFESYIINIYKGNLPEALKIFTYTILKFDKCNFS...PKHLNR      | 175 |
| T.cacao       | YASNQLGERHSYSSFLVLLKIGRSRKHFSIVDDLLIRLKTDRYVPTLFESYLIKVYAEANLPERALKTFFYKMLEFNIRFL...PKHLNR   | 161 |
| E.guttata     | LASRQNERHSYATCTHLLKIGRSRHFSSIMQALLSSLKSKDYSSISPLETHIIQIYGDAKMPKALKTFFYTILEFNIRFL...TKQDNC    | 165 |
| S.bicolor     | VTS...FTTTPHPATLHSLRLRPAR.RRDHHPHALALLRRLPSPSPRLLPLLLAVLRLRRFPQLFLSTFNSLFFVSGSPFLPLHPELRLR   | 118 |
| Z.mays        | VTS...FTTTPHPATLHSLRLRPAR.RRDHHPHALALLRRLPSPSPRLLPLLLAAVLRRLRRFPQLFLSTFNSLFFVSGSPFLPLHPELRLR | 118 |
| S.italica     | VTS...FTTTPHPATLHSLRLRPAR.RRDHHPHALALLRRLPSPSPRLLPLLLAVLRLRRFPQLFLSTFNSLFFVSGSPFLPLHPELRLR   | 118 |
| B.distachyon  | VTS...FTTTPHPATLHSLRLRPAR.RRDHHPHALALLRRLPSPSPRLLPLLLSVLRLRRFPQLFLSTFNSLFFVSGSPFLPLHPELRLR   | 118 |
| O.sativa      | VTA...FTTAPHSTLHSLRLRPAR.RRDHHPHALALLRRLPSPSPRLLPLLLSALRLRRFPQLFLSTFNSLFFVSGSPFLPLHPELRLR    | 121 |

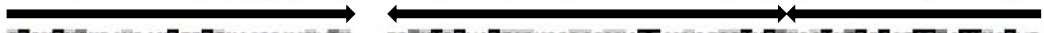

|               |                                                                                           |     |
|---------------|-------------------------------------------------------------------------------------------|-----|
| A.thaliana    | IIDVIVSHRGYLQKAFELFKSSRLHGVN...TRYNYIMRAFCLNDDLSIAYLQKGLMERVVVVDVSKYIICGHCRSGOVNGAME      | 246 |
| B.rapa        | IIEVIVSHRGYLQKALELFKSARLHGVN...TRYNYIMRAFCLNDDLSIAYLQKGLMERVVVVDVSKYIICGHCRSGOVNGAME      | 248 |
| C.papaya      | IIEVIVSHRSYLRPFDFERSAHRHGVLEN...IQSYNYIMRAFCLNGDISIAYSLNKMFKRVLVPOVESYRILMGCICRSGOVNGAVD  | 257 |
| P.trichocarpa | IIEVIVSHHNYIKPFAFDELKDAHTYDVFN...TKSYNYIMRAFCLNGQISMAYSLNQMFKRVVMPVESYRILMGCICRSGOVNGAVD  | 262 |
| T.cacao       | IIEVIVSHRNLMFAFDELKNAHKHGVLEN...TKSYNYIMRAFCLNGDLSVAYKLNKMFERVVVVDVSKYIIMGCICRSGOVNRAVD   | 248 |
| E.guttata     | IIEVIVANNFLRRAFDLFRAAHKHGVSAN...TKSYNYIMRAFCLSGDLSIAYTLNQMFKRVVLPOVESYRILMGCICRSGOVNRAVD  | 252 |
| S.bicolor     | IIGVIVSSPSPHFPSALHLLRRLVSSRLPPLAPLVLASHNIIIDAAARSGHVAVLSLHRLRSLVSPADYVYRITQCSICRGAOVRTAAT | 208 |
| Z.mays        | IIGVIVSSPSPHFPSALHLLRRLVSSRLPPLAPLVLASHNIIIDAAARSGHVAVLSLHRLRSLVSPADYVYRITQCSICRGAOVRTAAT | 208 |
| S.italica     | IIGVIVSSPSPHFPSALHLLRRLVSSRLPPLAPLVLASHNIIIDAAARSGHVAVLSLHRLRSLVSPADYVYRITQCSICRGAOVRTAAT | 208 |
| B.distachyon  | IIGVIVSSPSPHFPSALHLLRRLVSSRLPPLAPLVLASHNIIIDAAARSGHVAVLSLHRLRSLVSPADYVYRITQCSICRGAOVRTAAT | 208 |
| O.sativa      | IISVIVSSPSPHFPSALHLLRDLVSTRPLPEPLVLASHNIIIDAAARSGHVAVLSLHRLRSLVSPADYVYRITQCSICRGOVHTAAT   | 211 |

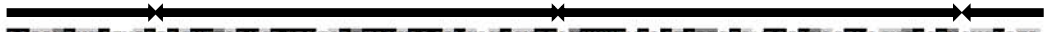

|               |                                                                                            |     |
|---------------|--------------------------------------------------------------------------------------------|-----|
| A.thaliana    | LLDDMLNKGFEVDRTSYTLLNSLCKRKTLEAYKLLCRKVKVGCNPDVHYNTVITGECREGRAMDARKVLLDDMLNSGCSNLSVSYRTL   | 336 |
| B.rapa        | LLEDMLNKGFEVDRTSYTLLNSLCKRKTLEAYKLLCRKVKVGCNPDVHYNTVITGECREGRAMDARKVLLDDMLNSGCSNLSVSYRTL   | 338 |
| C.papaya      | LLEDMLNKGFEVDRTSYTLLNSLCKRKTLEAYKLLCRKVKVGCNPDVHYNTVITGECREGRAMDACKVLEDMPNSGCLNLSVSYRTL    | 347 |
| P.trichocarpa | LLEDMLNKGFEVDRTSYTLLNSLCKRKTLEAYKLLCRKVKVGCNPDVHYNTVITGECREGRAMDACKVLEDMPNSGCMNLSVSYRTL    | 352 |
| T.cacao       | LLEDMLNKGFEVDRTSYTLLNSLCKRKTLEAYKLLCRKVKVGCNPDVHYNTVITGECREGRAMDACKVLEDMPNSGCLNLSVSYRTL    | 338 |
| E.guttata     | LLEDMLNKGFEVDRTSYTLLNSLCKRKTLEAYKLLCRKVKVGCNPDVHYNTVITGECREGRAMDACKVLEDMPNSGCLNLSVSYRTL    | 342 |
| S.bicolor     | LLEDMLHRGIPADPRLAYTVLNLALCRKQCLEAYRLLCINRGRGVSVDVHYNTVITGECREGRAMDACKVLEDMPNSGCLNLSVSYRTL  | 298 |
| Z.mays        | LLEDMLHRGIPADPRLAYTVLNLALCRKQCLEAYRLLCINRGRGVSVDVHYNTVITGECREGRAMDACKVLEDMPNSGCLNLSVSYRTL  | 298 |
| S.italica     | LLEDMLHRGIPADPRLAYTVLNLALCRKQCLEAYRLLCINRGRGVSVDVHYNTVITGECREGRAMDACKVLEDMPNSGCLNLSVSYRTL  | 298 |
| B.distachyon  | LLEDMLHRGIPADPRLAYTVLNLALCRKQCLEAYRLLCINRGRGVSVDVHYNTVITGECREGRAMDACKVLEDMPNSGCLNLSVSYRTL  | 298 |
| O.sativa      | LLEDMLHRGIPADPRLAYTVLNLALCRKQCLEAYRLLCINRGRGVSVDVHYNTVITGECREGRAMDACKVLEDMPRESGCAENAVTYTAV | 301 |

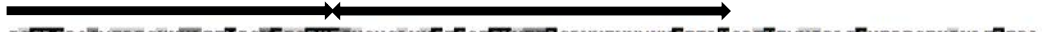

|               |                                                                                                    |     |
|---------------|----------------------------------------------------------------------------------------------------|-----|
| A.thaliana    | IGGLDQGMFDEGKRYLEEMISKGFSPHESVSNCLVKGCGSFGKVEBACDVVEVMKNGETIHSDDTMEWVPLIINEDESEKIKLLEDA            | 426 |
| B.rapa        | IGGLDQGMFDEGKRYLQEMISKGFSPHESVSNCLVKGCGSFGKVEBACDVVELVMKNGDALHSDDTMEWVPLIIPVCKEDVSEKIQRELEDA       | 428 |
| C.papaya      | VGGLDQDRIEGEAKRYLEEMLSKGFSPHESIALVGEVGNVGIKIEACVLVEKMLNHGEAHHMDTWTIIPMIGVEDDRVCMEEILDKV            | 437 |
| P.trichocarpa | VGGLDQGMFDEAKSHLEEMMKGFSPHESAVSNALIKGFENVGKIEACGVVEELLKHGEAHHMDTWTIIPMIGVEDDLQRIEGELEDA            | 442 |
| T.cacao       | IGGLDQGMFDEAKKMEBMLKGFSPHESVSHTLVKGCGSFGKVEBACDVVEVMKNGEIVGFGEMLYKGEVHHMDTWLIIIPRIEEDYETERMGEILEEV | 428 |
| E.guttata     | VGGLDQGMFDEAKTYVVKVMISKGFSPHESIVHILVTGCRIGKIEBACEVLCCELLGHGNSPHDTWAEIHLTVGEEYNTAMGDVVKQV           | 432 |
| S.bicolor     | VNGLGVSLYDKAEAYLVDMVGNLVPHEVSVFHSVIRKCCVTVGRVBAQAQMSWMLDLGVVPHVESWSSVIRCVCKDED...CIEABLLQI         | 386 |
| Z.mays        | VNGLGVSLYDKAEAYLVDMVGNLVPHEVSVFHSVIRKCCVTVGRVBAQAQMSWMLDLGVVPHVESWSSVIRCVCKDED...CIEABLLQI         | 386 |
| S.italica     | VNGLGVSLYDKAEAYLVDMVGNLVPHEVSVFHSVIRKCCVTVGRVBAQAQMSWMLDLGVVPHVESWSSVIRCVCKDED...CIEABLLQI         | 386 |
| B.distachyon  | VNGLGISLFDKAEAYLVDMVGGGIIIPHEVSVFHSVIRKCCVTVGRVBAQAQMSWMLDLGIPPEAETWSSVIRCVCKDED...YIEVILLHM       | 386 |
| O.sativa      | VNGLGVNLYDKAEAYLDMGLKGLIIPHEVSVLHSVIRKCCVAVGRVBAQAQMMTRMLDLGMVPEAETWSSVIRSVSDEE...NVEVLLQV         | 389 |

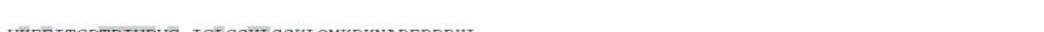

|               |                                                        |     |
|---------------|--------------------------------------------------------|-----|
| A.thaliana    | VKEEITGDTRIVDVG.IGLGSYLSSKLMKRNARERRRL.....            | 466 |
| B.rapa        | MKVEISGDTRIVDAGIIGLGSYLSSKRMKRNARERRRL.....            | 468 |
| C.papaya      | IKIEITGNTRIVDAG.IGLEGLYLVKKIQSKLWRA.....               | 470 |
| P.trichocarpa | KKVELKGDTRIVEAG.IGLEEYLKIKRTQOKAWRY.....               | 475 |
| T.cacao       | MKVEIKRTRIVDAG.TGLEDYLIKIRISRSKRP.....                 | 461 |
| E.guttata     | LKVEIKPNTRIVDVG.AALEEYLTKKIKTRDQGVVYSCRGDGVSLSHASCHSAC | 485 |
| S.bicolor     | VG.R.....                                              | 389 |
| Z.mays        | VG.RQRGSNMISDRVP.....                                  | 401 |
| S.italica     | VT.GRRHGSSTSSTLK.....                                  | 401 |
| B.distachyon  | MQEQKRCNSNMISKSTW.....                                 | 402 |
| O.sativa      | MKGIKHRSNINRSRTWT.....                                 | 406 |

**Supplementary Figure S6: Multiple sequence alignments of MISF protein homologs from a selection of dicot and monocot plant species.** Amino acid sequence alignments of three MISF proteins from a representative selection of dicot (*Arabidopsis thaliana*, *Brassica rapa*, *Carica papaya*, *Theobroma cacao*, *Populus trichocarpa*, *Erythranthe guttata*) and monocot (*Oryza sativa*, *Zea mays*, *Sorghum bicolor*, *Setaria italic*, *Brachypodium distachyon*) plant species. Identical and non-identical amino acids were shaded in black and grey respectively. PPR motifs are indicated by double arrow lines. Grey bars represent protein regions corresponding to mitochondrial targeting sequences, according to TargetP predictions. (A), (B) and (C) show the corresponding results from MISF26, MISF68 and MISF74 alignments.





|                         |       |      |
|-------------------------|-------|------|
| A.th_nad2_3'-int2       | ..... | 0    |
| B.rapa_nad2_3'-int2     | ..... | 0    |
| C.papaya_nad2_3'-int2   | ..... | 0    |
| E.quattara_nad2_3'-int2 | ..... | 160  |
| Z.mays_nad2_3'-int2     | ..... | 0    |
| O.sativa_nad2_3'-int2   | ..... | 0    |
|                         |       |      |
| A.th_nad2_3'-int2       | ..... | 63   |
| B.rapa_nad2_3'-int2     | ..... | 65   |
| C.papaya_nad2_3'-int2   | ..... | 63   |
| E.quattara_nad2_3'-int2 | ..... | 320  |
| Z.mays_nad2_3'-int2     | ..... | 63   |
| O.sativa_nad2_3'-int2   | ..... | 0    |
|                         |       |      |
| A.th_nad2_3'-int2       | ..... | 234  |
| B.rapa_nad2_3'-int2     | ..... | 215  |
| C.papaya_nad2_3'-int2   | ..... | 230  |
| E.quattara_nad2_3'-int2 | ..... | 473  |
| Z.mays_nad2_3'-int2     | ..... | 237  |
| O.sativa_nad2_3'-int2   | ..... | 123  |
|                         |       |      |
| A.th_nad2_3'-int2       | ..... | 341  |
| B.rapa_nad2_3'-int2     | ..... | 344  |
| C.papaya_nad2_3'-int2   | ..... | 341  |
| E.quattara_nad2_3'-int2 | ..... | 598  |
| Z.mays_nad2_3'-int2     | ..... | 346  |
| O.sativa_nad2_3'-int2   | ..... | 204  |
|                         |       |      |
| A.th_nad2_3'-int2       | ..... | 406  |
| B.rapa_nad2_3'-int2     | ..... | 514  |
| C.papaya_nad2_3'-int2   | ..... | 515  |
| E.quattara_nad2_3'-int2 | ..... | 753  |
| Z.mays_nad2_3'-int2     | ..... | 430  |
| O.sativa_nad2_3'-int2   | ..... | 494  |
|                         |       |      |
| A.th_nad2_3'-int2       | ..... | 643  |
| B.rapa_nad2_3'-int2     | ..... | 674  |
| C.papaya_nad2_3'-int2   | ..... | 678  |
| E.quattara_nad2_3'-int2 | ..... | 709  |
| Z.mays_nad2_3'-int2     | ..... | 645  |
| O.sativa_nad2_3'-int2   | ..... | 595  |
|                         |       |      |
| A.th_nad2_3'-int2       | ..... | 804  |
| B.rapa_nad2_3'-int2     | ..... | 827  |
| C.papaya_nad2_3'-int2   | ..... | 816  |
| E.quattara_nad2_3'-int2 | ..... | 1062 |
| Z.mays_nad2_3'-int2     | ..... | 816  |
| O.sativa_nad2_3'-int2   | ..... | 736  |
|                         |       |      |
| A.th_nad2_3'-int2       | ..... | 942  |
| B.rapa_nad2_3'-int2     | ..... | 964  |
| C.papaya_nad2_3'-int2   | ..... | 972  |
| E.quattara_nad2_3'-int2 | ..... | 1213 |
| Z.mays_nad2_3'-int2     | ..... | 945  |
| O.sativa_nad2_3'-int2   | ..... | 896  |
|                         |       |      |
| A.th_nad2_3'-int2       | ..... | 1111 |
| B.rapa_nad2_3'-int2     | ..... | 1124 |
| C.papaya_nad2_3'-int2   | ..... | 1075 |
| E.quattara_nad2_3'-int2 | ..... | 1392 |
| Z.mays_nad2_3'-int2     | ..... | 1195 |
| O.sativa_nad2_3'-int2   | ..... | 1043 |
|                         |       |      |
| A.th_nad2_3'-int2       | ..... | 1256 |
| B.rapa_nad2_3'-int2     | ..... | 1252 |
| C.papaya_nad2_3'-int2   | ..... | 1251 |
| E.quattara_nad2_3'-int2 | ..... | 1516 |
| Z.mays_nad2_3'-int2     | ..... | 1251 |
| O.sativa_nad2_3'-int2   | ..... | 1156 |
|                         |       |      |
| A.th_nad2_3'-int2       | ..... | 1409 |
| B.rapa_nad2_3'-int2     | ..... | 1401 |
| C.papaya_nad2_3'-int2   | ..... | 1437 |
| E.quattara_nad2_3'-int2 | ..... | 1647 |
| Z.mays_nad2_3'-int2     | ..... | 1401 |
| O.sativa_nad2_3'-int2   | ..... | 1352 |
|                         |       |      |
| A.th_nad2_3'-int2       | ..... | 1559 |
| B.rapa_nad2_3'-int2     | ..... | 1569 |
| C.papaya_nad2_3'-int2   | ..... | 1572 |
| E.quattara_nad2_3'-int2 | ..... | 1546 |
| Z.mays_nad2_3'-int2     | ..... | 1498 |
| O.sativa_nad2_3'-int2   | ..... | 1498 |
|                         |       |      |
| A.th_nad2_3'-int2       | ..... | 1720 |
| B.rapa_nad2_3'-int2     | ..... | 1712 |
| C.papaya_nad2_3'-int2   | ..... | 1747 |
| E.quattara_nad2_3'-int2 | ..... | 1758 |
| Z.mays_nad2_3'-int2     | ..... | 1689 |
| O.sativa_nad2_3'-int2   | ..... | 1647 |
|                         |       |      |
| A.th_nad2_3'-int2       | ..... | 1866 |
| B.rapa_nad2_3'-int2     | ..... | 1863 |
| C.papaya_nad2_3'-int2   | ..... | 1838 |
| E.quattara_nad2_3'-int2 | ..... | 1898 |
| Z.mays_nad2_3'-int2     | ..... | 1839 |
| O.sativa_nad2_3'-int2   | ..... | 1772 |
|                         |       |      |
| A.th_nad2_3'-int2       | ..... | 2022 |
| B.rapa_nad2_3'-int2     | ..... | 2019 |
| C.papaya_nad2_3'-int2   | ..... | 2045 |
| E.quattara_nad2_3'-int2 | ..... | 2053 |
| Z.mays_nad2_3'-int2     | ..... | 1994 |
| O.sativa_nad2_3'-int2   | ..... | 1524 |
|                         |       |      |
| A.th_nad2_3'-int2       | ..... | 2171 |
| B.rapa_nad2_3'-int2     | ..... | 2167 |
| C.papaya_nad2_3'-int2   | ..... | 2200 |
| E.quattara_nad2_3'-int2 | ..... | 2104 |
| Z.mays_nad2_3'-int2     | ..... | 2153 |
| O.sativa_nad2_3'-int2   | ..... | 2075 |
|                         |       |      |
| A.th_nad2_3'-int2       | ..... | 2250 |
| B.rapa_nad2_3'-int2     | ..... | 2302 |
| C.papaya_nad2_3'-int2   | ..... | 2315 |
| E.quattara_nad2_3'-int2 | ..... | 2317 |
| Z.mays_nad2_3'-int2     | ..... | 2310 |
| O.sativa_nad2_3'-int2   | ..... | 2253 |
|                         |       |      |
| A.th_nad2_3'-int2       | ..... | 2382 |
| B.rapa_nad2_3'-int2     | ..... | 2392 |
| C.papaya_nad2_3'-int2   | ..... | 2392 |
| E.quattara_nad2_3'-int2 | ..... | 2392 |
| Z.mays_nad2_3'-int2     | ..... | 2392 |
| O.sativa_nad2_3'-int2   | ..... | 2392 |
|                         |       |      |
| A.th_nad2_3'-int2       | ..... | 2499 |
| B.rapa_nad2_3'-int2     | ..... | 2499 |
| C.papaya_nad2_3'-int2   | ..... | 2499 |
| E.quattara_nad2_3'-int2 | ..... | 2499 |
| Z.mays_nad2_3'-int2     | ..... | 2499 |
| O.sativa_nad2_3'-int2   | ..... | 2499 |

B55

B56

B54





**Supplementary Figure S7: Multiple sequence alignments analyzing the conservation of the different predicted RNA targets of each MISF protein.** Multiple sequence alignments of the different MISF protein intron targets from a representative selection of dicot (*Arabidopsis thaliana*, *Brassica rapa* and *Carina papaya*) and monocot (*Oryza sativa*, *Zea mays*) species. The sequences corresponding to the MISF predicted binding sites are shown in black boxes. (A): Alignment of *nad2* intron 3 sequences. BS1 to BS3 represent the three putative RNA binding sites of MISF26 in *nad2* intron 3. (B) and (C): Sequence alignment of 5'- and 3'-portions of *nad2* intron 2 (trans-intron). The six potential RNA binding sites of MISF68 are shown as BS1 to BS6. (D): Sequence alignment of *nad4* intron 1. The two potential RNA binding sites of MISF68 are shown as BS1 to BS2. (E): Alignment of *nad1* intron 4 sequences. Since *nad1* intron 4 is fragmented in certain plant species, the sequences used for the alignment correspond only to the 300 nucleotides downstream of the *matR* open reading frame. The only putative RNA binding site of MISF74 is shown as BS1. (F): Alignment of *nad2* intron 4 sequences. BS1 represents the single putative RNA binding site found for MISF74 in *nad2* intron 4.
